# Supplementary material for: Identification of an Alternative Splicing Product of the Otx2 Gene Expressed in the Neural Retina and Retinal Pigmented Epithelial Cells
Source: PLOS journal article supplement (doi:10.1371/journal.pone.0150758), 2016-03-17

A.

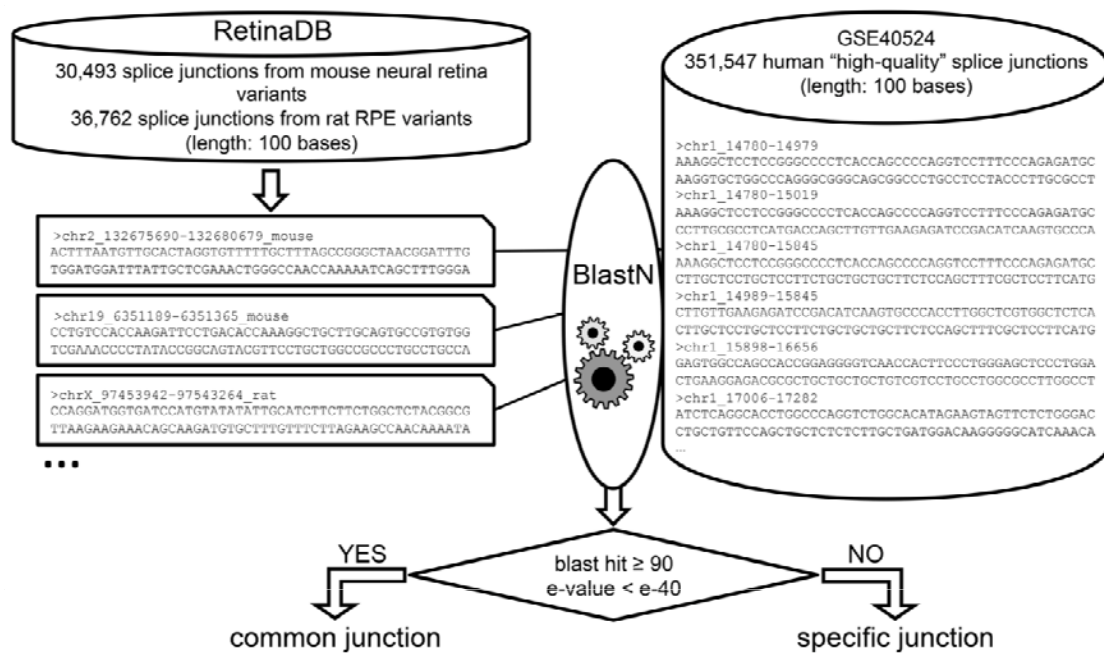

D.

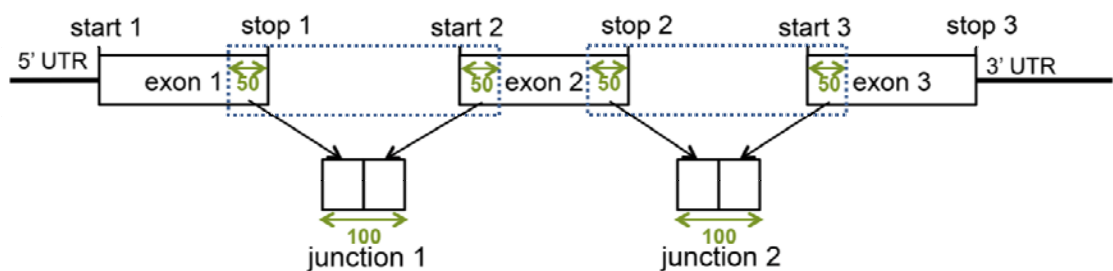

Supplement: S2 (10.1371/journal.pone.0150758.s002) [file journal.pone.0150758.s002]
